# Supplementary material for: MnS nanocomposites based on doped graphene: simple synthesis by a wet chemical route and improved electrochemical properties as an electrode material for supercapacitors
Source: Royal Society of Chemistry journal article supplement (doi:10.1039/c6ra25457h), 2017-01-01
Supplement: c6ra25457h1.pdf [file c6ra25457h1.pdf]

# **MnS nanocomposites based on doped graphene: simple synthesis by wet chemical route and improved electrochemical properties as electrode material for supercapacitors**

Rajendran Ramachandran,<sup>a, b</sup> Murugan Saranya,<sup>b, c</sup> Andrews Nirmala Grace,<sup>b</sup> Fei Wang<sup>a, \*</sup>

<sup>a</sup> Department of Electronic and Electrical Engineering, Southern University of Science and Technology, Shenzhen 518055, China

<sup>b</sup> Centre for Nanotechnology Research, VIT University, Vellore - 632 014, Tamil Nadu, India.

<sup>c</sup> Platinum Retail Ltd, Chorleywood Road, Rickmansworth, United Kingdom.

\* To whom correspondence should be addressed:

E-mail: wangf@sustc.edu.cn

### **Preparation of Graphene Oxide (GO)**

Graphene oxide was prepared through modified Hummer's method according to the previous literature.<sup>24</sup> Graphite powder (0.5 g) and sodium nitrate (0.5 g) were mixed with 23 ml of concentrated sulfuric acid (98% pure) under stirring in an ice bath. After four hours, potassium permanganate (3 g) was added into the mixture. The reaction mixture was maintained at 35°C for two hours with continuous stirring in water bath, which was later diluted with 46 ml of water. After that, the temperature was raised to 98°C and maintained for two hours. Then the reaction mixture was diluted with 100 ml warm (50°C) water and 10 ml hydrogen peroxide under stirring. After 1 hour, the solution turned light yellow in color. The powders were collected after repeated washing in deionized water by centrifugation and the collected powder was dried at 60°C for 24 h.

### **Preparation of Graphene**

Graphene was synthesized using sodium borohydride as a reducing agent.<sup>25</sup> Initially, GO (40 mg) and water (40 ml) were ultrasonicated for 1 hour. Then, this GO dispersed water was taken in an airtight container (60 ml capacity). Then, it was added with sodium borohydride (0.24 g) and 5 ml of 1M sodium hydroxide solution. The mixture was kept at 90°C for 1 hour. After cooled to room temperature, the powder was separated by centrifuging at 7500 rpm. Finally the powder was dried at 60°C for 24 hrs.

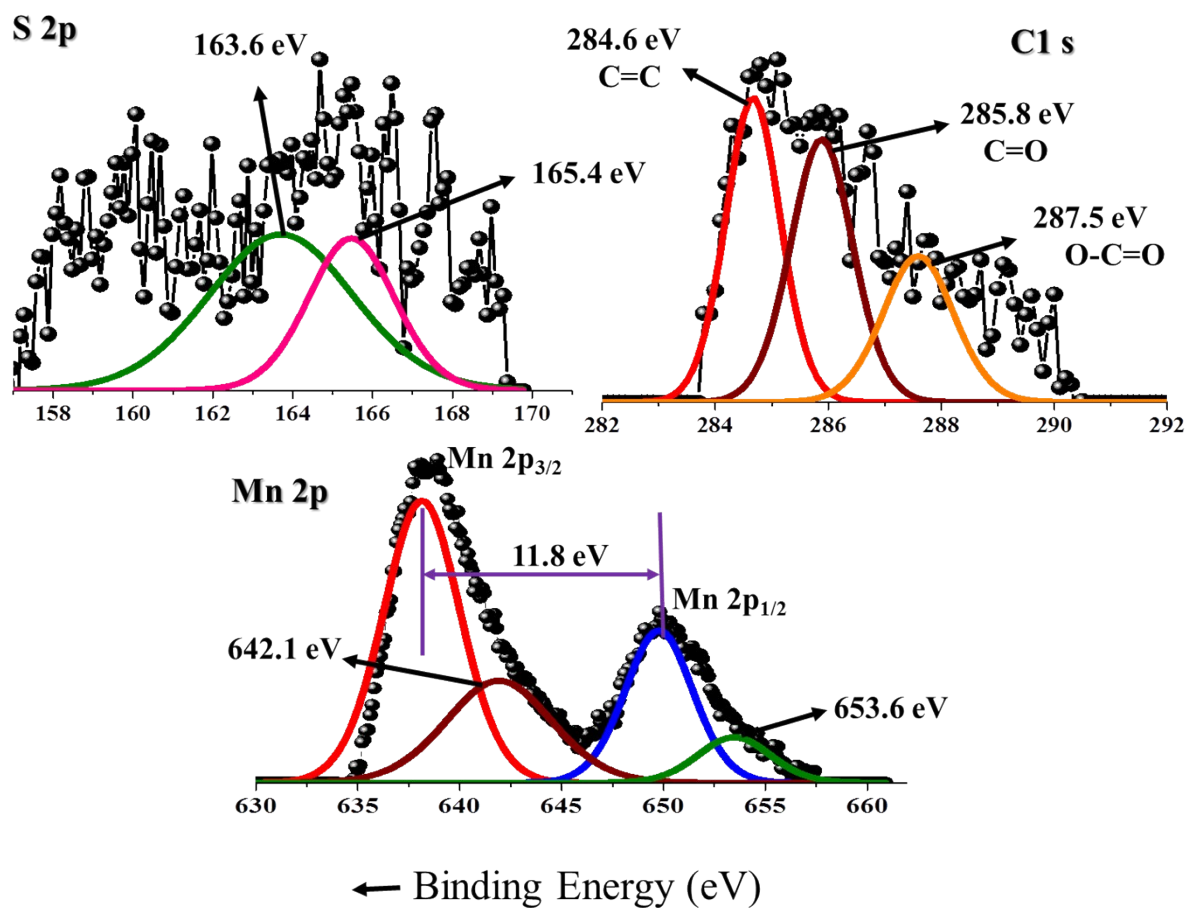

Fig. S1 Core level XPS spectrum of S2p, C1s and Mn2p of MnS/G-9 nanocomposite

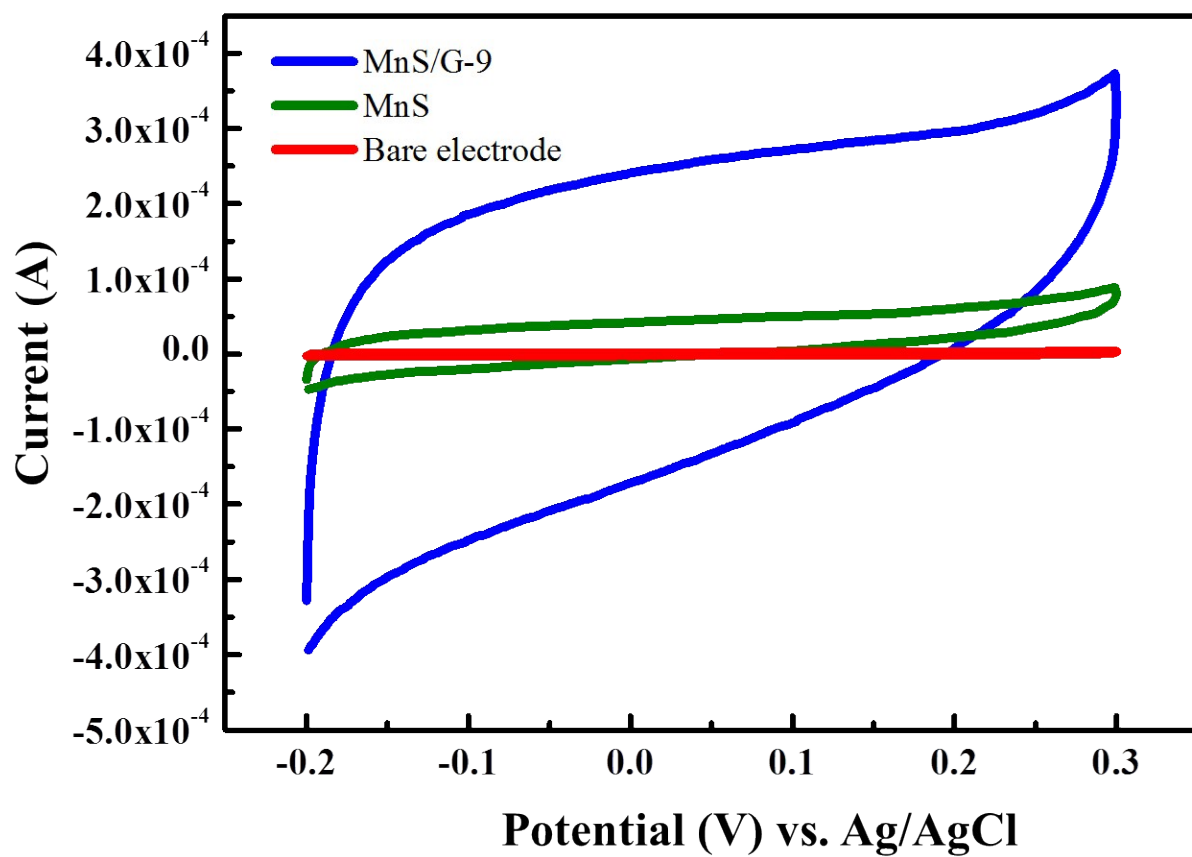

Fig. S2 Comparison of CV curve of bare carbon electrode, MnS/G-9 and pure MnS at 100 mV scan rate

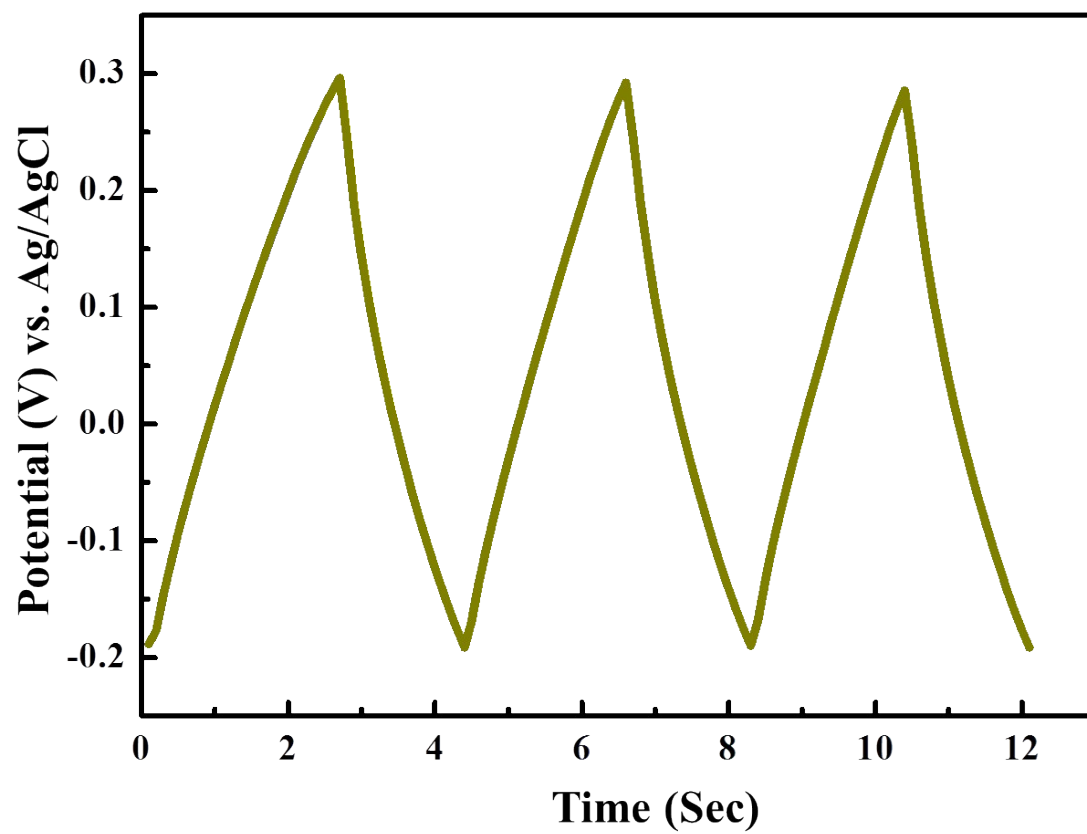

Fig. S3 Galvanostatic charge/discharge behavior of pure MnS (Expanded image of Fig. 11)
